# Supplementary material
Source: publisher figshare collection journal article supplement (https://acs.figshare.com/ndownloader/files/25632762)
Supplement: Supplementary file 1 [file 25632762]

## Supporting Information

### Highly Sensitive Interlocked Piezoresistive Sensors Based on Ultrathin Ordered Nanocone Array Films and Their Sensitivity Simulation

Yawen Lu,<sup>†, ‡, #</sup> Yin He,<sup>†, ‡, #</sup> Jutao Qiao,<sup>†, ‡</sup> Xin Niu,<sup>†, ‡</sup> Xiaojie Li,<sup>§</sup> Hao Liu,<sup>†, ‡, \*</sup> and Li Liu<sup>||, \*</sup>

<sup>†</sup>School of Textiles Science and Engineering, Tiangong University, Tianjin 300387, China.

<sup>‡</sup>Institute of Smart Wearable Electronic Textiles, Tiangong University, Tianjin 300387, China.

<sup>§</sup>Key Laboratory of Advanced Textile Composite Materials, Ministry of Education, Tiangong University, Tianjin 300387, China.

<sup>||</sup> Beijing Institute of Fashion Technology, Beijing 100029, China.

\*Corresponding authors: liuhao\_0760@163.com, fzyll@bift.edu.cn

#These authors contributed equally to this work.

## Section 1 Calculation of theoretical resistance

Piezoresistive mainly on the contact resistance ( $R^c$ ) and the intrinsic resistance ( $R^i$ ) between the two neighboring nanocones of IOCA.

$$R = R^c + R^i \quad (1)$$

The  $R^c$  at the contact surface between the interlocked nanocones can be defined by Holm's equation <sup>[1]</sup>:

$$R^c = \frac{1}{2k\sqrt{A/\pi}} \quad (2)$$

where  $A$  is the contact area between interlocked nanocones,  $k$  is the equivalent conductivity of the two contacting nanocones.

The  $R^i$  of PPy nanocones in the composite film can be defined as:

$$R^i = \rho \frac{L}{s} \quad (3)$$

where  $\rho$  is resistivity of PPy nanocones,  $L$  is the height of the interlocked nanocones,  $s$  is the equivalent cross-sectional area of the interlocked nanocones.

Since the influence on the resistivity  $\rho$  and conductivity  $k$  are small under the small load, the change of  $\rho$  and  $k$  are not considered during the loading process. Longitudinal compression has a great influence on the variation of the longitudinal length ( $L$ ) of the conductor, while the variation on the lateral cross-sectional area ( $s$ ) is negligibly small.

Therefore, the relative resistance change can be derived as follows:

$$R_0 = R_0^c + R_0^i \quad (4)$$

$$\frac{\Delta R^c}{R_0^c} = 1 - \sqrt{\frac{A_0}{A}} \quad (5)$$

$$\frac{\Delta R^i}{R_0^i} = \frac{\Delta L}{L_0} \quad (6)$$

$$\frac{\Delta R}{R_0} = \frac{R_0^c}{R_0} \times \frac{\Delta R^c}{R_0^c} + \frac{R_0^i}{R_0} \times \frac{\Delta R^i}{R_0^i} = \frac{R_0^c}{R_0} \times \left(1 - \sqrt{\frac{A_0}{A}}\right) + \frac{R_0^i}{R_0} \times \frac{\Delta L}{L_0} \quad (7)$$

$$\frac{R_0^c}{R_0} + \frac{R_0^i}{R_0} = 1 \quad (8)$$

$$\frac{\Delta R}{R_0} = \left(1 - \frac{R_0^i}{R_0}\right) \times \left(1 - \sqrt{\frac{A_0}{A}}\right) + \frac{R_0^i}{R_0} \times \frac{\Delta L}{L_0} \quad (9)$$

$$S = \frac{\Delta R/R_0}{P} = \left(1 - \frac{R_0^i}{R_0}\right) \times \frac{(1 - \sqrt{A_0/A})}{P} + \frac{R_0^i}{R_0} \times \frac{\Delta L/L_0}{P} \quad (10)$$

The  $R_0$  is the initial resistance of the IOCA, and the  $R_0^i$  is equal to the sum of interlocked OCA sheet resistances, which are constant and can be measured by U3402A digital multimeters (Agilent Technologies, USA) (in Table. S1). The resistance change ( $\Delta R/R_0$ ) are affected by contact area (A) and interlocked layers height changes (L). The calculation of theoretical formula were shown in Table. S2.

**Table S1.** Summary of the resistance parameters of different pressure sensors based on planar, 1460 nm, 750 nm and 460 nm sized OCA.

| Structure   |         | Corresponding Resistance |          |           |             |
|-------------|---------|--------------------------|----------|-----------|-------------|
|             |         | $r^i$                    | $R_0^i$  | $R_0$     | $R_0^i/R_0$ |
| Interlocked | 1460 nm | 2219.092                 | 4438.185 | 26996.259 | 0.1644      |
|             | 750 nm  | 2032.172                 | 4064.343 | 14117.204 | 0.2879      |
|             | 460 nm  | 1703.195                 | 3406.389 | 7108.492  | 0.4792      |
|             | planar  | 1000.000                 | 2000.000 | 2043.945  | 0.9785      |
| Single      | single  | -                        | 3219.092 | 13497.243 | 0.2385      |

**Table S2.** Theoretical Formula of IOCA based on planar, 1460 nm, 750 nm and 460 nm sized OCA.

| Structure | Theoretical Formula                                                         |
|-----------|-----------------------------------------------------------------------------|
| 1460      | $\Delta R/R_0 = 0.8356 \left(1 - \sqrt{A_0/A}\right) + 0.1644 \Delta L/L_0$ |
| 750       | $\Delta R/R_0 = 0.7121 \left(1 - \sqrt{A_0/A}\right) + 0.2879 \Delta L/L_0$ |
| 460       | $\Delta R/R_0 = 0.5208 \left(1 - \sqrt{A_0/A}\right) + 0.4792 \Delta L/L_0$ |
| Planar    | $\Delta R/R_0 = 0.0215 \left(1 - \sqrt{A_0/A}\right) + 0.9785 \Delta L/L_0$ |
| Single    | $\Delta R/R_0 = 0.7615 \left(1 - \sqrt{A_0/A}\right) + 0.2385 \Delta L/L_0$ |

## Section 2 Experiment Supplement

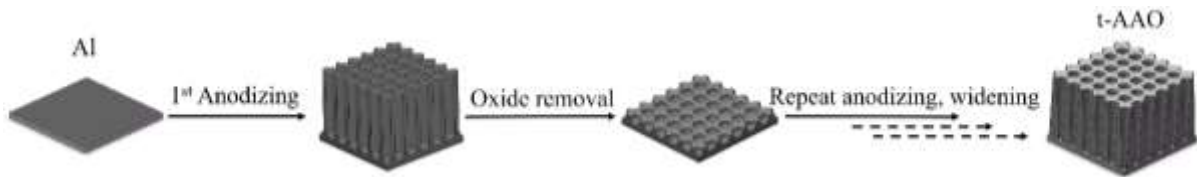

**Figure S1.** Schematic illustration of the preparation of t-AAO.

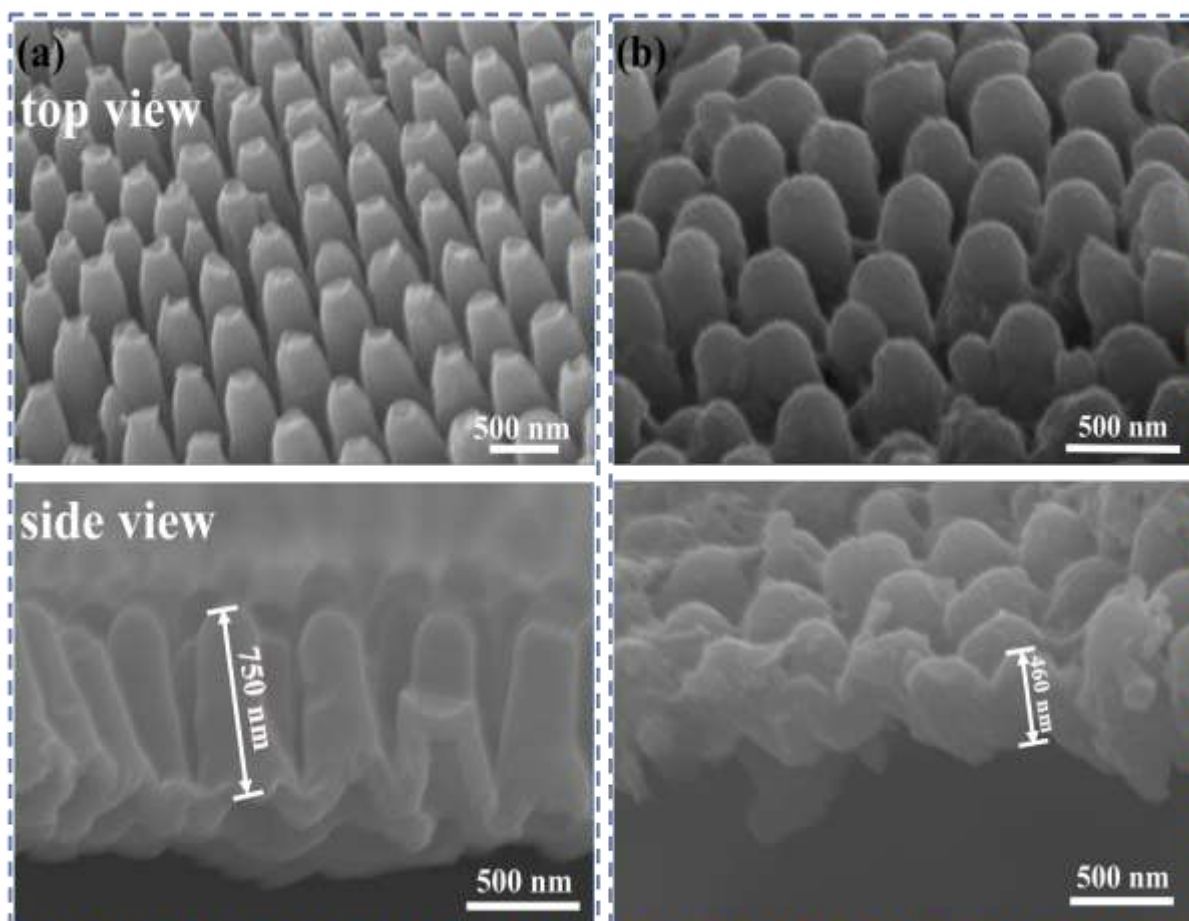

**Figure S2.** Top view and side view FESEM images of OCA with the length of (a) 750 nm, (b) 460 nm.

**Table S3.** Dimensions of four different finite elements geometry structure of the OCA in side view and in 45°C angle view.

|          | Side View                                                                                               | 45°C Angle View                                                                      |
|----------|---------------------------------------------------------------------------------------------------------|--------------------------------------------------------------------------------------|
| OCA-1460 | 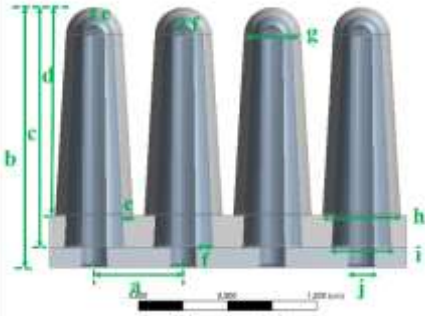                       |    |
|          | a=500nm, b=1460nm, c=1350nm, d=1170nm, e=80nm, f=70nm, g=320nm, h=440nm, i=280nm, j=140nm, k=1cm, l=1cm |                                                                                      |
| OCA-750  |                       |   |
|          | a=500nm, b=750nm, c=640nm, d=460nm, e=80nm, f=70nm, g=320nm, h=440nm, i=280nm, j=140nm, k=1cm, l=1cm    |                                                                                      |
| OCA-460  |                      |  |
|          | a=500nm, b=460nm, c=350nm, d=170nm, e=80nm, f=70nm, g=320nm, h=440nm, i=280nm, j=140nm, k=1cm, l=1cm    |                                                                                      |
| CPF      |                      |  |
|          | m=180nm, n=110nm, k=1cm, l=1cm                                                                          |                                                                                      |

Note: m is the thickness of PPy, which is equivalent to (c-d); n is the thickness of PMMA, which is equivalent to (b-c).

**Table S4.** Summary of the key parameters of recently reported micro-nano structure sensors.

| Materials                               | Electrical signal | Pressure sensitivity [kPa <sup>-1</sup> ] | Pressure range [kPa] | Minimum pressure detection [Pa] | Ref. in Main |
|-----------------------------------------|-------------------|-------------------------------------------|----------------------|---------------------------------|--------------|
| PVDF/rGO interlocked microdome          | Resistance        | 31.9                                      | < 0.02               | 0.6                             | [26]         |
| ZnO Nanowire/PDMS micropillar           | Resistance        | 6.8                                       | < 0.3                | 0.6                             | [28]         |
| CNT/PDMS                                | Resistance        | 15.1                                      | < 0.5                | 0.2                             | [29]         |
| PANI/Au/PDMS micropillars               | Current           | 2.0                                       | < 0.22               | 15                              | [33]         |
| Ag Nanowire/ rose petals                | Capacitance       | 1.54                                      | < 1                  | 0.6                             | [34]         |
| Ag Nanowire/PVDF                        | Capacitance       | 54.31                                     | < 0.5                | 0.1                             | [35]         |
| Ag Nanowire/PDMS                        | Capacitance       | 1.2                                       | < 2                  | 0.8                             | [38]         |
| Microstructured Au film/PDMS            | Current           | 50.17                                     | < 0.07               | 10.4                            | [42]         |
| Au Nanowire/ tissue paper               | Current           | 1.14                                      | < 5                  | 13                              | [58]         |
| SCNT/PDMS                               | Current           | 1.07                                      | 20                   | -                               | [59]         |
| Polypyrrole hollow-sphere PPy hydrogels | Resistance        | 133.1                                     | < 0.03               | 0.8                             | [60]         |

**Table S5.** Comparison of the key parameters of recently reported interlocked microstructured sensors.

| Microstructure surface | Size (diameter/ height) | Electrical signal | Sensitivity [kPa <sup>-1</sup> ] | Pressure range [kPa] | Ref. in Main |
|------------------------|-------------------------|-------------------|----------------------------------|----------------------|--------------|
| Microcapsule           | 28μm /-                 | Current           | 24.63                            | 0.01-0.2             | [11]         |
| Nanowire               | 50 nm / 1μm             | Resistance        | 5                                | 0.5                  | [20]         |
| Microdome1             | 10μm / 4μm              | Resistance        | 31.9                             | < 0.02               | [26]         |
| Micropillar & Nanowire | 10μm / 10μm             | Resistance        | 6.8                              | < 0.3                | [28]         |
| Hemisphere             | 3.5μm / 6μm             | Resistance        | 15.1                             | < 0.5                | [29]         |
| Microdomain            | 18.4 μm / 16.1μm        | Current           | 50.17                            | < 0.07               | [42]         |
| Microdome2             | 45μm / 30μm             | Resistance        | 1.24                             | 0.15                 | [61]         |
| Microdome3             | 2.5μm / 1.5μm           | Current           | 196                              | 10                   | [62]         |
| Microridge1            | 100μm / 120μm           | Triboelectricity  | 0.55                             | -                    | [63]         |
| Microridge2            | 35μm / 30μm             | Current           | 3.3-10                           | 1                    | [64]         |
| Nanocone               | 260-440nm/ 1460 nm      | Resistance        | 268.36                           | 0.2                  | this work    |

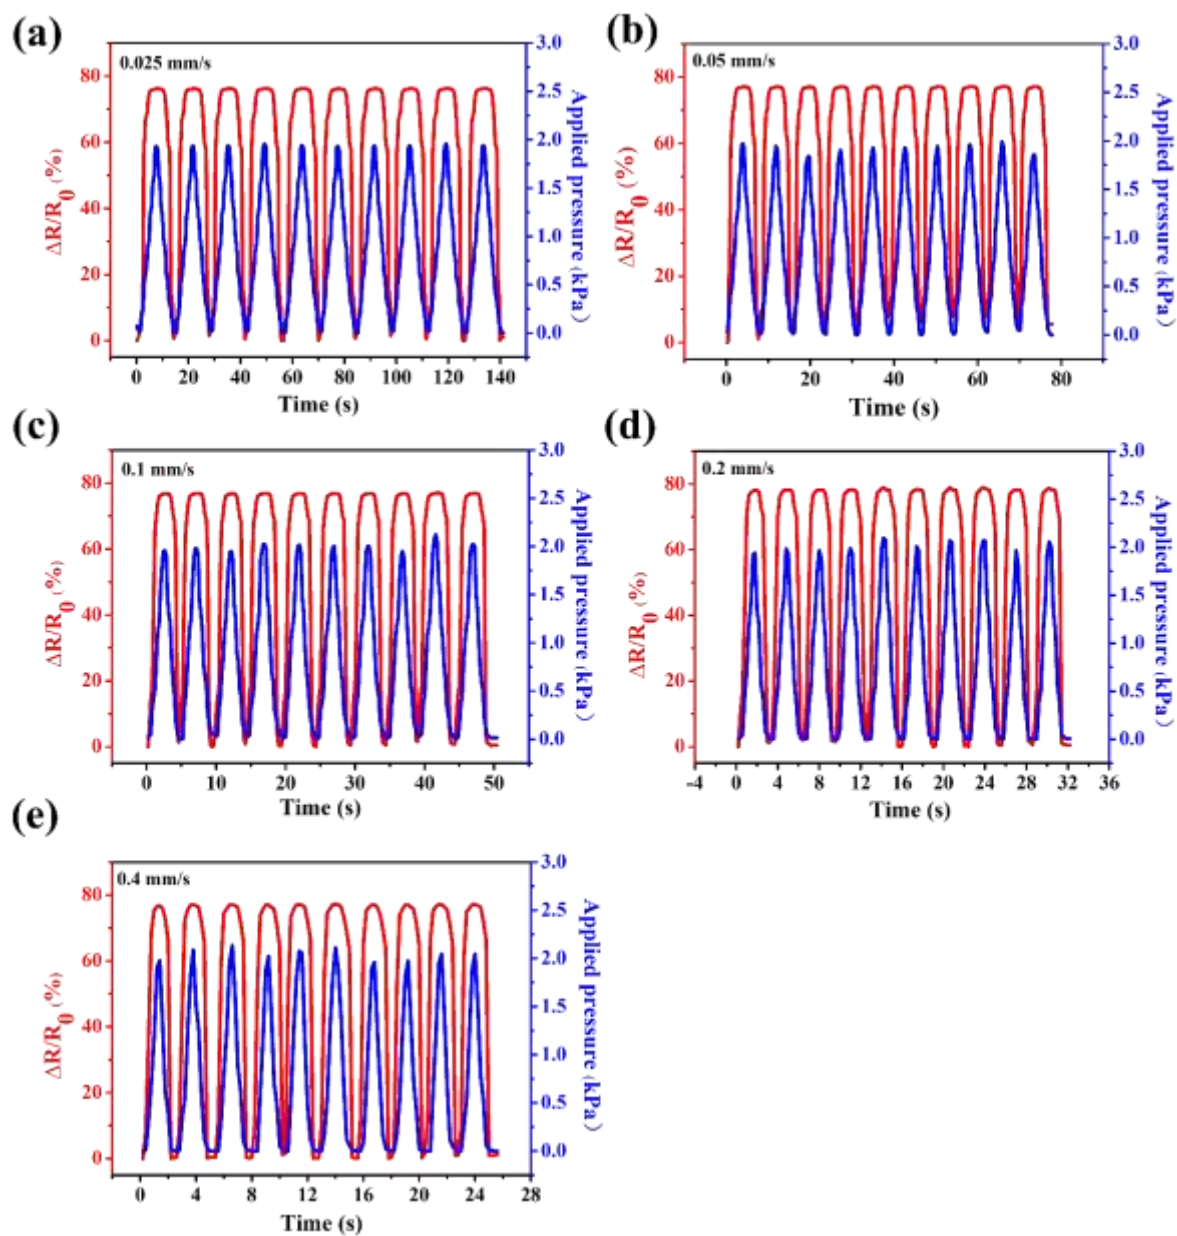

**Figure S3.** Resistance variations at a pressure of 2 kPa with applying speeds of (a) 0.025 mm/s, (b) 0.05 mm/s, (c) 0.1 mm/s, (d) 0.2 mm/s, and (e) 0.4 mm/s.

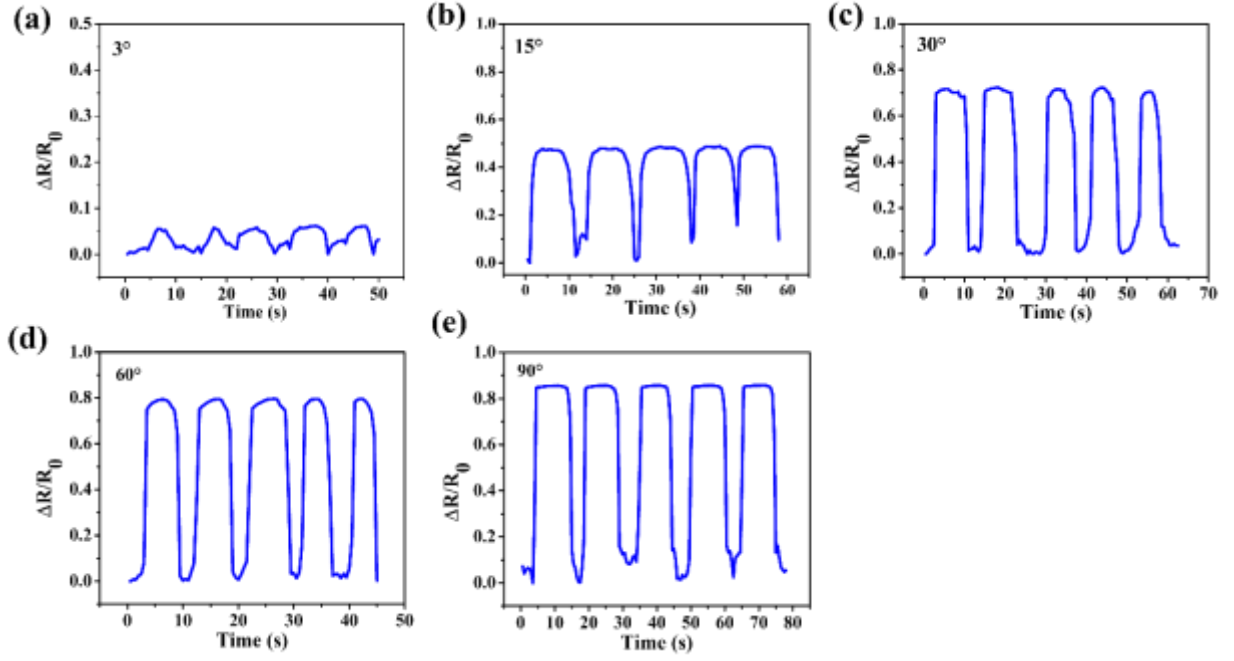

**Figure S4.** Resistance variations of the IOCA with angles of (a) 3°, (b) 15°, (c) 30°, (d) 60°, and (e) 90°.

## References

- (1) Wu, Z.; Wang, S.; Zhang, L.; Hu, J. An analytical model and parametric study of electrical contact resistance in proton exchange membrane fuel cells. *Journal of Power Sources*, **2009**, *189*(2), 1066-1073.
